# Supplementary material
Source: PubMed Central journal article supplement (PMC4465548)
Supplement: NIHMS682266-supplement-Supp_Material.pdf [file NIHMS682266-supplement-Supp_Material.pdf]

## SUPPLEMENTARY INFORMATION

### **Signaling between two interacting sensor kinases promotes biofilms and colonization by a bacterial symbiont**

Allison N. Norsworthy and Karen L. Visick\*

Department of Microbiology and Immunology, Loyola University Medical Center

\*Corresponding author

E-mail: [kvisick@luc.edu](mailto:kvisick@luc.edu)

Address for both authors:

2160 S. First Ave, Bldg. 105, Rm 3933

Maywood, IL 60153

(708)216-0869

**A**

|             |                                        |
|-------------|----------------------------------------|
| H-box       | Fhxxh (S/T/A) H (D/E) h (R/K) TPLxxh   |
| N-box       | (D/N) xxxhxxhhxNLhxNAh (F/H/Y) (S/T)   |
| D-box/F-box | hxhxhxDxGxGhxxxxxxxxhFxxF              |
| G-box       | GGxGLGLxhhxxhhxxxxGxhxhxxxxxxGxxFxxhxh |

**B**

|                             | H-box                                                         |                                        |                             |
|-----------------------------|---------------------------------------------------------------|----------------------------------------|-----------------------------|
| SypF ( <i>V. fischeri</i> ) | ---KSREFLASMSHEIRTPMNAV                                       | LGLLAILKDTTLKPNQKELVNTATDSSELLLSIINDIL |                             |
| ArcB ( <i>E. coli</i> )     | SRDKTTFISTISHELRTPLNIGI                                       | VGLSRILLDELTAEQEKYLKTIHVSAVTLGNIFNDII  |                             |
| VieS ( <i>V. cholerae</i> ) | -EARNHFLAVVSHELRTPIAAML                                       | LGLMEILASRLKNSESQLLLTNAISSAERLKLHVNDIL |                             |
| EnvZ ( <i>E. coli</i> )     | ---RTLLMAGVSHDLRTPLTRIR                                       | -----LATEMMSEQDGYLAESINKDIEECNAIIEQFI  |                             |
|                             | ..                                                            | ::: :*:*:*:*: : *                      | . : . . . : : : :           |
| SypF ( <i>V. fischeri</i> ) | DFSRMEANTFYLENHIFNIHKSLNSVLKTFHPQAQNKQLELSLFIADNVPTYVQGD      | DAHRL                                  |                             |
| ArcB ( <i>E. coli</i> )     | DMDKMERRKVQLDNQPVDFTSFLADLENLSALQAQKGLRFNLEPTLPLPHQVITD       | DGTRL                                  |                             |
| VieS ( <i>V. cholerae</i> ) | DFSKIEAQQQLQLDIGLYNLTDELGPLLGRFEASAQLKEIEFDVIWSPNSLLLANFDALRF |                                        |                             |
| EnvZ ( <i>E. coli</i> )     | DYLRTG---QEMPMEMADLNAVLGEVIA--AESGYEREIETALYPG---SIEVKMHPLSI  |                                        |                             |
|                             | * :                                                           | : :                                    | * : .. : : : . :            |
|                             | N-box                                                         |                                        | D-box/F-box                 |
| SypF ( <i>V. fischeri</i> ) | RQILLNLVGNLSLKFTD                                             | DQGQVQILVNAEEHEGRIC                    | HLHCSVQDSGIGIQEQLEYLEFDEFMT |
| ArcB ( <i>E. coli</i> )     | RQILWNLISNAVKFTD                                              | QGGQVTVRVRYDEGD---                     | MLHFEVEDSGIGIPQDELDKIFAMYYQ |
| VieS ( <i>V. cholerae</i> ) | NQIVTNLLSNAIKFTD                                              | QGRVVFKIDVAPEM---                      | LTIVVEDTGCGMTQTQIESLFPFAQ   |
| EnvZ ( <i>E. coli</i> )     | KRAVANMVVNAARYGN-                                             | GWIKVSSGTEPNR---                       | AWFQVEDDGPPIAPEQRKHLFPFVR   |
|                             | .. : * : : * : : :                                            | : * : .                                | * : * * * : : . : * :       |
|                             | G-Box                                                         |                                        |                             |
| SypF ( <i>V. fischeri</i> ) | ADNSFS-RTHEGSGGLGLAICQRLVHMMDGTITVNSQYGLGSEFSFNI              | QLDKATTKE----                          |                             |
| ArcB ( <i>E. coli</i> )     | VKDSHGGKPAITGTGIGLAISRRLAKNMGGDITVTSEQKGGSTFTLTI              | H-----                                 |                             |
| VieS ( <i>V. cholerae</i> ) | ADSTIT-RRFEGGTGLGMSIVANLIELMNGKIEVKSEFEQGTQIQVNI              | -----                                  |                             |
| EnvZ ( <i>E. coli</i> )     | GDSART---ISGTGLGLAIVQRIVDNHNGMLELGTSEGGLSIRAWI                | PVPVTRAQGTKE                           |                             |
|                             | .. :                                                          | * : * : * : : : . . . *                | : : : . * : : :             |

**Supplementary Figure S1. Sequence alignment of SypF with known, functional histidine kinases.** (A) Homology boxes in HisKA and HATPase<sub>c</sub> domains (Grebe and Stock, 1999). The HisKA region contains the site of autophosphorylation within the H-box, and the HATPase<sub>c</sub> domain contains the N, D, F, and G-boxes, which bind ATP and/or metal cofactors. (B) Sequence alignment of HisKA and HATPase<sub>c</sub> domains from SypF and known functional SKs. Sequences were obtained from the following bacterial strains: *V. fischeri* ES114, *E. coli* MG1655, and *Vibrio cholerae* AC50, and were aligned using the online software, ClustalW, <http://embnet.vital-it.ch/software/ClustalW.html>. \* represents an identical amino acid; : represents a highly conserved amino acid; = represents a moderately conserved amino acid.

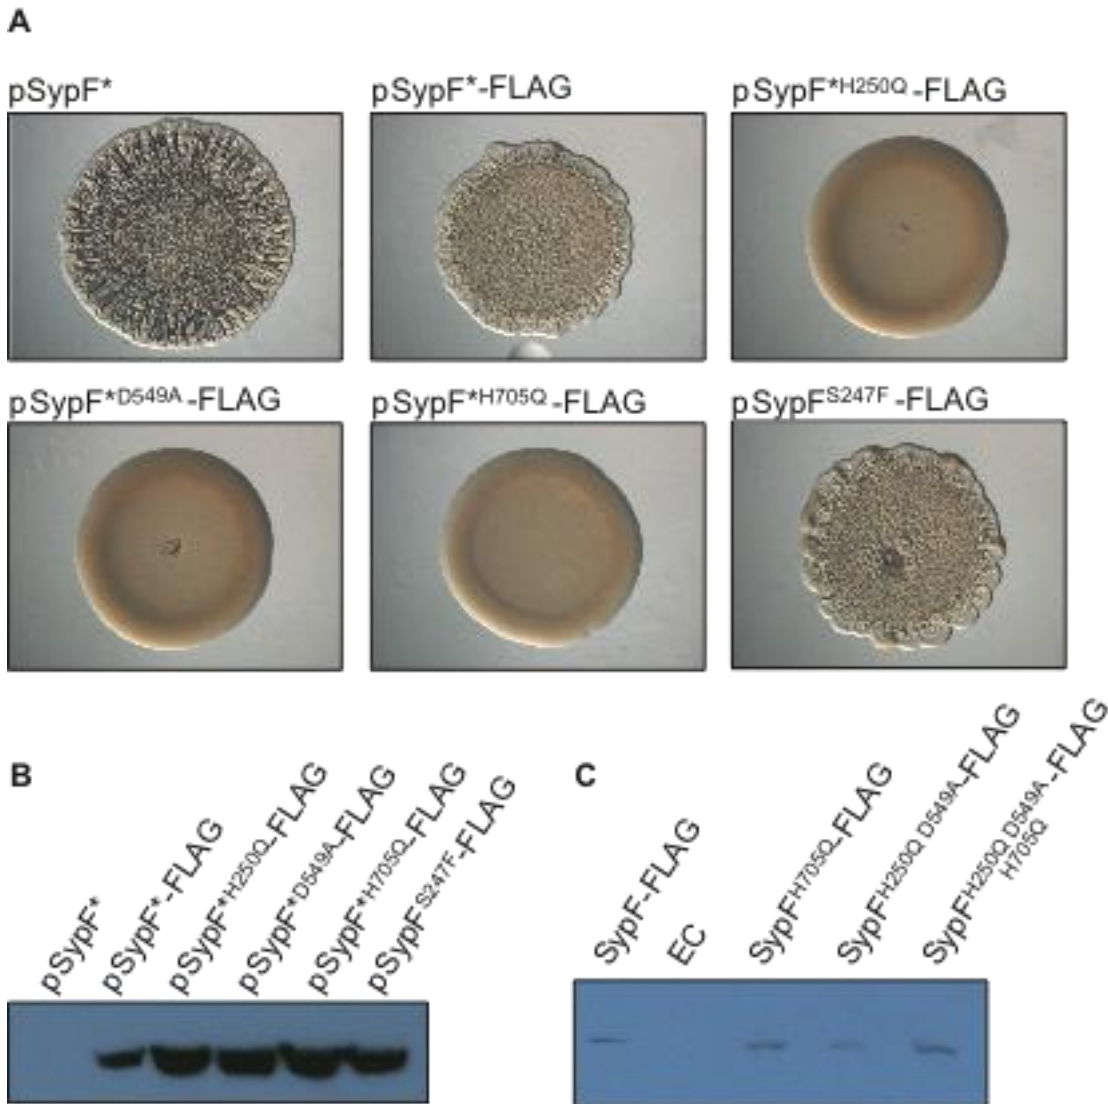

**Supplementary Figure S2. Wrinkled Colony phenotype and/or expression of SypF\*-FLAG and SypF-FLAG variants.**

(A) Wrinkled colony assay of wild-type (ES114) cells overproducing SypF variants from a plasmid. Plasmids are as indicated: pSypF\* (pCLD29); pSypF\*-FLAG (pANN70); pSypF\*<sup>H250Q</sup>-FLAG (pANN71); pSypF\*<sup>D549A</sup>-FLAG (pANN72); pSypF\*<sup>H705Q</sup>-FLAG (pANN76); pSypF<sup>S247F</sup>-FLAG (pANN73). Cells were spotted on an agar plate and colony morphologies were assessed after 40 hours. (B) Western blot analysis of untagged SypF\* and FLAG-tagged SypF proteins from strains used in Supp. 1A. (C) Western blot analysis of FLAG-tagged SypF proteins encoded in single copy from the chromosome of a *sypF* deletion strain (See Fig 5A). EC: empty cassette. Strains are as follows: SypF-FLAG (KV6659); EC (KV6921); SypF<sup>H705Q</sup>-FLAG (KV7085); SypF<sup>H250Q D549A</sup>-FLAG (KV7154); SypF<sup>H250Q D549A H705Q</sup>-FLAG (KV7155).

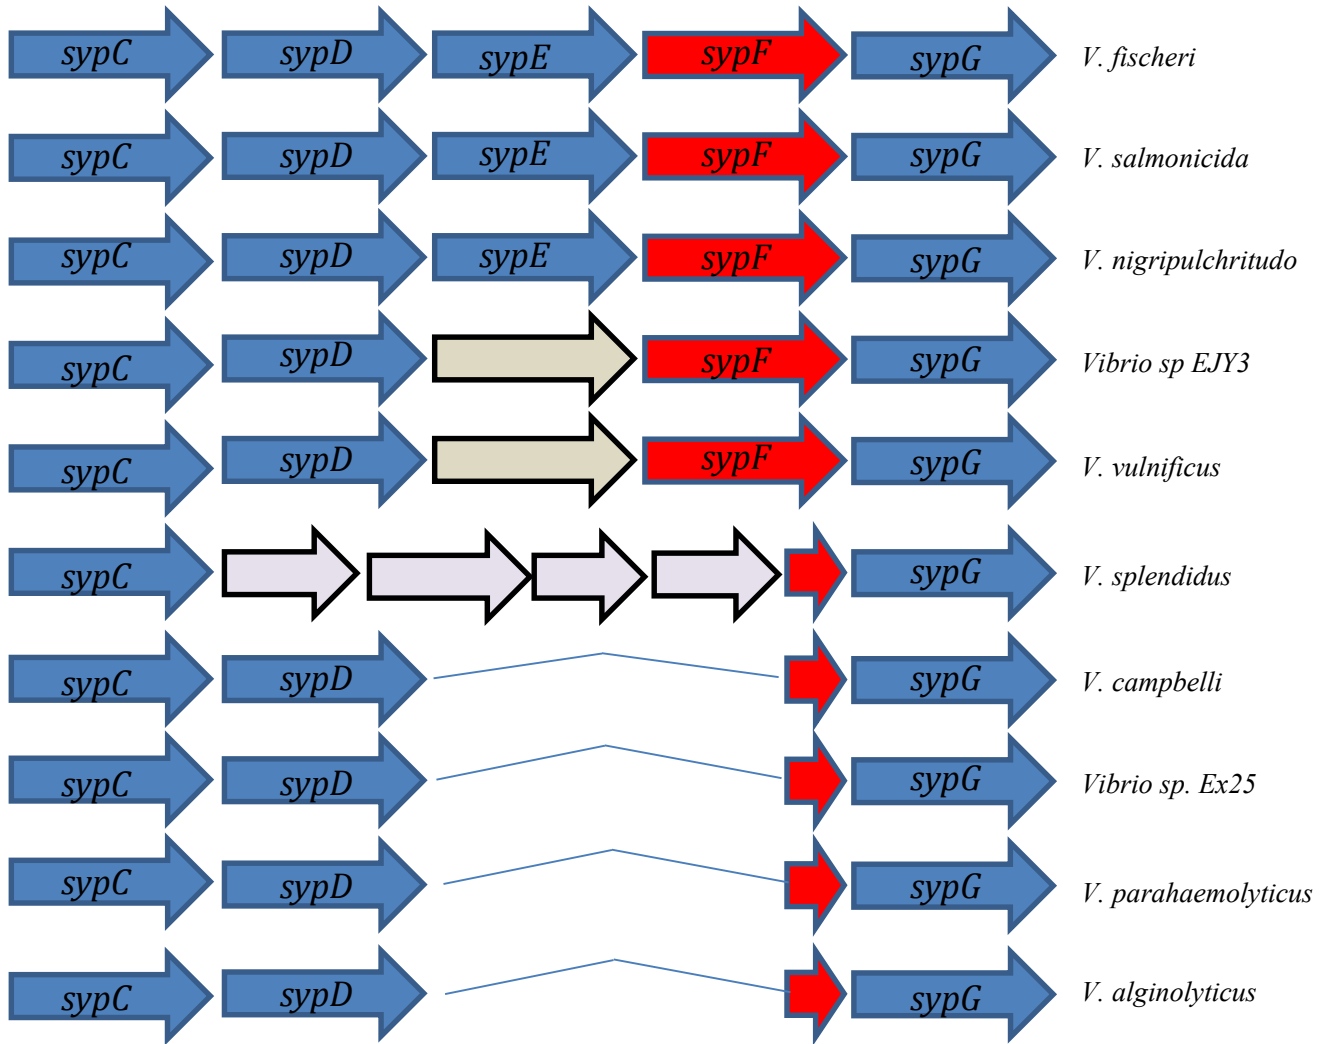

**Supplementary Figure S3. The genomic region around *sypF* and *sypF*-like HPT-encoding genes in *Vibrio* species.** A subset of *Vibrio* genomes that contain *syp* genes are depicted (Altschul *et al.*, 1997, Altschul *et al.*, 2005). The organisms containing *sypF* or *sypF*-like genes are as follows. *Aliivibrio salmonicida* LFI1238 (VSAL\_II0307)(Holland *et al.*, 1997), *Vibrio nigripulchritudo* (VIBNI\_A1485)(Goudenege *et al.*, 2013), *Vibrio* sp. EJY3 (VEJY3\_08720)(Roh *et al.*, 2012), *Vibrio vulnificus* YJ016 (VV1628)(Chen *et al.*, 2003), *V. splendidus* LGP32 (VS\_1526), *Vibrio campbellii* ATCC BAA-1116 (VIBHAR\_02229)(Wang *et al.*, 2013), *Vibrio* sp. Ex25 (VEA\_003532), *Vibrio parahaemolyticus* RMID 2210644 (VP1472)(Makino *et al.*, 2003), and *Vibrio alginolyticus* NBRC 15630 = ATCC 17749 (VAL01S\_15\_00550). For EJY3 and *V. vulnificus*, the gene in the position of *sypE* encodes a phosphonate ABC transporter substrate-binding protein. For *V. splendidus*, *sypD* and *sypE* are lacking, and four other genes are present between the *sypC*-like gene and the HPT-encoding gene. For the last four, the blue line indicates the absence of *sypE* and the 5' end of *sypF*. Arrows depicting genes are not to scale.

**Supplementary Table 1. Plasmids used in this study**

| <i>Name</i> | <i>Description</i>                                                               | <i>Relevant Primers</i> | <i>Source or Reference</i>     |
|-------------|----------------------------------------------------------------------------------|-------------------------|--------------------------------|
| pANN17      | pKV363 + 3.8 kb sequences flanking <i>sypE sypF</i>                              | 1219, 519, 1249, 1375   | This study                     |
| pANN20      | pEVS107 + P <sub>lac</sub> - <i>sypF</i> -FLAG                                   | 1609, 1563              | This study                     |
| pANN21      | pEVS107 + P <sub>lac</sub> - <i>sypF</i> <sup>D549A</sup> -FLAG                  | 1609, 1563              | This study                     |
| pANN24      | pEVS107 + P <sub>lac</sub> - <i>sypF</i> <sup>H250Q</sup> -FLAG                  | 1609, 1563              | This study                     |
| pANN34      | pEVS107 + P <sub>lac</sub> - <i>sypG</i> *-FLAG                                  | 1609 1438               | This study                     |
| pANN45      | pEVS107 + P <sub>lac</sub> - <i>sypF</i> <sup>H705Q</sup> -FLAG                  | 1795, 1793, 1796, 1794  | This study                     |
| pANN46      | pEVS107 + P <sub>lac</sub> - <i>sypF</i> <sup>H705Q D549A H705Q</sup> -FLAG      | 1795, 1793, 1796, 1794  | This study                     |
| pANN48      | pMAL-c5x producing <i>SypF</i> amino acids 95-766                                | 1828, 1829              | This study                     |
| pANN49      | pMAL-c5x producing <i>SypG</i> -REC amino acids 1-118                            | 1809, 1810              | This study                     |
| pANN50      | pARM47 <sup>1</sup> + P <sub>lac</sub> - <i>sypF</i> -HPt-FLAG                   | 1902, 1796              | This study                     |
| pANN52      | pANN34 + P <sub>sypA</sub> - <i>lacZ</i>                                         | N/A                     | This study                     |
| pANN58      | pARM47 <sup>1</sup> + P <sub>lac</sub> - <i>sypF</i> -HPt <sup>H705Q</sup> -FLAG | 1902, 1796              | This study                     |
| pANN59      | pJMO8 + P <sub>sypA</sub> - <i>lacZ</i>                                          | 1860, 1861              | This study                     |
| pANN61      | pKV69 + <i>sypF</i> * <sup>D549A</sup>                                           | 1295                    | This study                     |
| pANN62      | pKV69 + <i>sypF</i> * <sup>H705Q</sup>                                           | 1569                    | This study                     |
| pANN65      | pEVS107 + P <sub>lac</sub> - <i>sypF</i> <sup>H705Q D549A</sup> -FLAG            | 1795, 1796              | This study                     |
| pANN69      | pCLD29 <sup>2</sup> + <i>rscS</i> - <i>sypF</i> chimera-FLAG                     | 1899, 1900, 1901, 1882  | This study                     |
| pANN70      | pCLD29 <sup>1</sup> + <i>sypF</i> *-FLAG                                         | 1881, 1882              | This study                     |
| pANN71      | pCLD29 <sup>1</sup> + <i>sypF</i> * <sup>H705Q</sup> -FLAG                       | 1881, 1786, 1785, 1882  | This study                     |
| pANN72      | pCLD29 <sup>1</sup> + <i>sypF</i> * <sup>D549A</sup> -FLAG                       | 1295                    | This study                     |
| pANN73      | pCLD29 <sup>1</sup> + <i>sypF</i> <sup>S247F</sup> -FLAG                         | 1881, 1784, 1783, 1882  | This study                     |
| pANN74      | pMAL-c5x producing <i>SypF</i> * amino acids 95-766                              | 1828, 1829              | This study                     |
| pANN76      | pCLD29 <sup>1</sup> + <i>sypF</i> * <sup>H705Q</sup> -FLAG                       | 1881, 1793, 1794, 1882  | This study                     |
| pANN77      | pARM47 <sup>1</sup> <i>rscS</i> - <i>sypF</i> chimera                            | 1908, 1907              | This study                     |
| pANN78      | pARM47 <sup>1</sup> <i>rscS</i>                                                  | 1908, 1909              | This study                     |
| pARM7       | pKV282 + <i>rscS</i>                                                             | N/A                     | (Morris <i>et al.</i> , 2011)  |
| pARM47      | pEVS107 + P <sub>lac</sub> <i>sypE</i>                                           | N/A                     | (Morris <i>et al.</i> , 2011)  |
| pARM141     | pGEX-5X-1 + <i>sypE</i>                                                          | N/A                     | (Morris & Visick, 2013)        |
| pCLD29      | pKV69 + <i>sypF</i> *                                                            | N/A                     | (Darnell <i>et al.</i> , 2008) |
| pCLD54      | pKV69 + <i>sypF</i>                                                              | N/A                     | (Darnell <i>et al.</i> , 2008) |
| pEVS104     | Conjugal helper plasmid ( <i>tra trb</i> )                                       | N/A                     | (Stabb & Ruby, 2002)           |
| pEVS107     | Mini-Tn7 delivery plasmid, OriR6K, mob                                           | N/A                     | (McCann <i>et al.</i> , 2003)  |
| pKV282      | Vector, Tet <sup>R</sup>                                                         | N/A                     | (Morris <i>et al.</i> , 2011)  |
| pJET1.2     | Commercial cloning vector, Ap <sup>R</sup>                                       | N/A                     | Fermentas                      |
| pJMO8       | Suicide vector with sequences flanking the Tn7 site                              | N/A                     | (Ondrey & Visick, 2014)        |
| pKPQ17      | pKV363 + 1 kb sequences flanking <i>sypF</i>                                     | 910, 1160, 1249, 271    | This study                     |
| pKV69       | Vector; Cm <sup>R</sup> , Tet <sup>R</sup>                                       | N/A                     | (Visick & Skoufos, 2001)       |
| pKV363      | Suicide plasmid                                                                  | N/A                     | (Shibata <i>et al.</i> , 2012) |
| pKV456      | pKV363 + 1.5 kb sequences flanking <i>rscS</i>                                   | 1494, 1495, 1496, 1497  | This study                     |
| pMAL-c5X    | Commercial MBP tag protein expression vector; Ap <sup>R</sup>                    | N/A                     | New England Biolabs            |
| pUX-BF13    | Transposase expressing vector                                                    | N/A                     | (Bao <i>et al.</i> , 1991)     |

<sup>1</sup> restriction enzymes were used to remove the original *sypE* sequence but maintain P<sub>lacZ</sub> to drive expression of inserted DNA sequences

<sup>2</sup> the original *sypF*\* sequence was removed from pCLD29 using restriction enzymes before the insertion of indicated DNA sequences

## Supplementary Table 2. Primers used in this study.

### Primers

| <i>Name</i> | <i>Sequence (5' - 3')</i>                                      |
|-------------|----------------------------------------------------------------|
| 271         | CTCGGCGCATACTTCTTTAC                                           |
| 519         | GGGTGGTGTACTCGCTAC                                             |
| 910         | GTGGTGTAAATCATGGCCCATACTCTATTACCACAA                           |
| 1160        | TAGGCGGCCGCACCTTAGTATGGATGCACTGAATAATTGAGATAACC                |
| 1219        | TAGGCGGCCGCACCTTAGTATGTGTGGGCTTTGTATCTGAAAAAAG                 |
| 1249        | CATACTAAGTGCGGCCGCCTAAAACAAGTTTTCTCAAATAAAAAG                  |
| 1295        | (P) GACCTTATTTTCATGGCTATATCTATGCCTGAAATGGATGGCATGACGGC         |
| 1375        | TCATCATTCCGATTCTTCATAG                                         |
| 1438        | AAAAAGGTACCTTATTTATCATCATCATCTTTATAATCTTCCGATTCTTCATAGGCTTCCCA |
| 1494        | TACTGACGTATCCGTGTTGC                                           |
| 1495        | GGCCGATGCTAAAGATTCAG                                           |
| 1496        | TAGGCGGCCGCACCTTAGTATGAATGATTGTGATAAGGCTATAACG                 |
| 1497        | CATACTAAGTGCGGCCGCCTAAAGTATGAAACACAATAAACTTCG                  |
| 1563        | ACCCGGGTTATTTATCATCATCATCTTTATAATCTTGAGAAACCTTGTTTATTTTC       |
| 1569        | (P) GCATTAGAGTTTGAAGCGCAAACATTAGGAAGCAGTGCATTAACG              |
| 1609        | AACTAGTGGCAGCAGAGTTTCCCGAC                                     |
| 1783        | GTAAGTTCGATTTTTCATGAGTCACG                                     |
| 1784        | GGGGTTCGTATTTTCGTGACTCATGAAAGCTAAAAA                           |
| 1785        | CAATATGACCTTATTTTCATGGCTATATCTATGCC                            |
| 1786        | CATCCATTTTCAGGCATAGATATAGCCATGAAAATAAG                         |
| 1793        | AATGCACTGCTTCCTAATGTTTTCGCTTCAAACCTC                           |
| 1794        | ATGCATTAGAGTTTGAAGCGCAAACATTAGGAAGC                            |
| 1795        | GATCTACTAGTGGCCAGGTACCGGCACGACAGGTTTCCCGAC                     |
| 1796        | CCAGTCTAGTTCTAGAGGGCCCTTATTTATCATCATCATCTTTATAATC              |
| 1809        | TCACATATGTCCATGGGCGGCCGCATGCTACAGAAAGTATTATTAG                 |
| 1810        | CAGGGAATTCGGATCCGTCGACTAGGTGGTTAGCAATGGATG                     |
| 1828        | TCACATATGTCCATGGGCGGCCGCATGACATTTGACTTAAAACG                   |
| 1829        | CAGGGAATTCGGATCCGTCGACTTCTTTTATTTTGAGAAACC                     |
| 1860        | AACCATACTAAGTGCGGCCGCCTCTTAAGTCGATTCTCATTCTC                   |
| 1861        | GAGAGACAATATAGGCGGCCGCATAATGGATTTCCCTTACGC                     |
| 1881        | GCTTGCATGCCTGCAGGTCGACCATTATTGCTGTTAATTGAG                     |
| 1882        | CGAGCTCGGTACCCGGGGATCCTTATTTATCATCATCATCTTTAT                  |
| 1899        | GCTTGCATGCCTGCAGGTCGACGAATTACTCCCCTAATTACG                     |
| 1900        | TAGCTCATTATCCATTGCATCATCTGAAAGTTTATATTT                        |
| 1901        | CTTTCAGATGATGCAATGGATAATGAGCTATTATTAGTA                        |
| 1902        | GATTACGCCAAGCTTGCATGCAAGGAGCTAACTATGGATAATGAGCTATTATTAG        |
| 1907        | CCAGTCTAGTTCTAGAGGGCCCTTATTTTGAGAAACCTTGTTTA                   |
| 1908        | GATTACGCCAAGCTTGCATGCGAATTACTCCCCTAATTACGAAC                   |
| 1909        | CCAGTCTAGTTCTAGAGGGCCCCGAAGTTTATTGTGTTTCATAC                   |

## Supplementary References:

- Altschul, S.F., T.L. Madden, A.A. Schaffer, J. Zhang, Z. Zhang, W. Miller & D.J. Lipman, (1997) Gapped BLAST and PSI-BLAST: a new generation of protein database search programs. *Nucleic Acids Res* **25**: 3389-3402.
- Altschul, S.F., J.C. Wootton, E.M. Gertz, R. Agarwala, A. Morgulis, A.A. Schäffer & Y.-K. Yu, (2005) Protein database searches using compositionally adjusted substitution matrices. *FEBS J* **272**: 5101-5109.
- Bao, Y., D.P. Lies, H. Fu & G.P. Roberts, (1991) An improved Tn7-based system for the single-copy insertion of cloned genes into chromosomes of gram-negative bacteria. *Gene* **109**: 167-168.
- Chen, C.Y., K.M. Wu, Y.C. Chang, C.H. Chang, H.C. Tsai, T.L. Liao, Y.M. Liu, H.J. Chen, A.B. Shen, J.C. Li, T.L. Su, C.P. Shao, C.T. Lee, L.I. Hor & S.F. Tsai, (2003) Comparative genome analysis of *Vibrio vulnificus*, a marine pathogen. *Genome Res* **13**: 2577-2587.
- Darnell, C.L., E.A. Husa & K.L. Visick, (2008) The putative hybrid sensor kinase SypF coordinates biofilm formation in *Vibrio fischeri* by acting upstream of two response regulators, SypG and VpsR. *J Bacteriol* **190**: 4941-4950.
- Goudenege, D., Y. Labreuche, E. Krin, D. Ansquer, S. Mangenot, A. Calteau, C. Medigue, D. Mazel, M.F. Polz & F. Le Roux, (2013) Comparative genomics of pathogenic lineages of *Vibrio nigripulchritudo* identifies virulence-associated traits. *ISME J* **7**: 1985-1996.
- Holland, L.Z., M. McFall-Ngai & G.N. Somero, (1997) Evolution of lactate dehydrogenase-A homologs of barracuda fishes (genus *Sphyræna*) from different thermal environments: differences in kinetic properties and thermal stability are due to amino acid substitutions outside the active site. *Biochemistry* **36**: 3207-3215.
- Makino, K., K. Oshima, K. Kurokawa, K. Yokoyama, T. Uda, K. Tagomori, Y. Iijima, M. Najima, M. Nakano, A. Yamashita, Y. Kubota, S. Kimura, T. Yasunaga, T. Honda, H. Shinagawa, M. Hattori & T. Iida, (2003) Genome sequence of *Vibrio parahaemolyticus*: a pathogenic mechanism distinct from that of *V. cholerae*. *Lancet* **361**: 743-749.
- McCann, J., E.V. Stabb, D.S. Millikan & E.G. Ruby, (2003) Population dynamics of *Vibrio fischeri* during infection of *Euprymna scolopes*. *Appl Environ Microbiol* **69**: 5928-5934.
- Morris, A.R., C.L. Darnell & K.L. Visick, (2011) Inactivation of a novel response regulator is necessary for biofilm formation and host colonization by *Vibrio fischeri*. *Mol Microbiol* **82**: 114-130.
- Morris, A.R. & K.L. Visick, (2013) Inhibition of SypG-induced biofilms and host colonization by the negative regulator SypE in *Vibrio fischeri*. *PLoS One* **8**: e60076.
- Ondrey, J.M. & K.L. Visick, (2014) Engineering *Vibrio fischeri* for Inducible Gene Expression. *Open Microbiol J* **8**: 122-129.
- Roh, H., E.J. Yun, S. Lee, H.J. Ko, S. Kim, B.Y. Kim, H. Song, K.I. Lim, K.H. Kim & I.G. Choi, (2012) Genome sequence of *Vibrio* sp. strain EJY3, an agarolytic marine bacterium metabolizing 3,6-anhydro-L-galactose as a sole carbon source. *J Bacteriol* **194**: 2773-2774.
- Shibata, S., E.S. Yip, K.P. Quirke, J.M. Ondrey & K.L. Visick, (2012) Roles of the structural symbiosis polysaccharide (*syp*) genes in host colonization, biofilm formation, and polysaccharide biosynthesis in *Vibrio fischeri*. *J Bacteriol* **194**: 6736-6747.
- Stabb, E.V. & E.G. Ruby, (2002) RP4-based plasmids for conjugation between *Escherichia coli* and members of the *Vibrionaceae*. *Methods Enzymol* **358**: 413-426.
- Visick, K.L. & L.M. Skoufos, (2001) Two-component sensor required for normal symbiotic colonization of *Euprymna scolopes* by *Vibrio fischeri*. *J Bacteriol* **183**: 835-842.
- Wang, Z., B. Lin, A. Mostaghim, R.A. Rubin, E.R. Glaser, P. Mittraparp-Arthorn, J.R. Thompson, V. Vuddhakul & G.J. Vora, (2013) *Vibrio campbellii* *hmgA*-mediated pyomelanization impairs quorum sensing, virulence, and cellular fitness. *Front Microbiol* **4**: 379.
